# Supplementary material for: Sub-kb Hi-C in D. melanogaster reveals conserved characteristics of TADs between insect and mammalian cells
Source: PubMed Central journal article supplement (PMC5768742; doi:10.1038/s41467-017-02526-9), 2018-01-15
Supplement: 41467_2017_2526_MOESM2_ESM.pdf [file 41467_2017_2526_MOESM2_ESM.pdf]

## **Description of Additional Supplementary Files**

### **File Name: Supplementary Data 1**

Description: Super-TADs in G1/S-arrested S2R+ cells.

### **File Name: Supplementary Data 2**

Description: TADs in G1/S-arrested S2R+ cells.
